1 **Shared vulnerability for connectome alterations across psychiatric and neurological**  
2 **brain disorders**

3

4 **Authors**

5 Siemon C. de Lange<sup>1</sup>, Lianne H. Scholtens<sup>1</sup>, Leonard H. van den Berg<sup>2</sup>, Marco P. Boks<sup>3</sup>,  
6 Marco Bozzali<sup>4,5</sup>, Wiepke Cahn<sup>3</sup>, Udo Dannlowski<sup>6</sup>, Sarah Durston<sup>3</sup>, Elbert Geuze<sup>3,7</sup>, Neeltje  
7 E.M. van Haren<sup>8</sup>, Manon H.J. Hillegers<sup>3,9</sup>, Kathrin Koch<sup>10,11</sup>, María Ángeles Jurado<sup>12,13,14</sup>,  
8 Matteo Mancini<sup>15</sup>, Idoia Marqués-Iturria<sup>12</sup>, Susanne Meinert<sup>6</sup>, Roel A. Ophoff<sup>3,16</sup>, Tim J.  
9 Reess<sup>10,11</sup>, Jonathan Repple<sup>6</sup>, René S. Kahn<sup>3,17</sup> and Martijn P. van den Heuvel<sup>1,18,\*</sup>

10 for the Alzheimer's Disease Neuroimaging Initiative<sup>19</sup>

11

12 <sup>19</sup> Data used in preparation of this article were obtained from the Alzheimer's Disease  
13 Neuroimaging Initiative (ADNI) database ([adni.loni.usc.edu](http://adni.loni.usc.edu)). As such, the investigators  
14 within the ADNI contributed to the design and implementation of ADNI and/or provided data  
15 but did not participate in analysis or writing of this report. A complete listing of ADNI  
16 investigators can be found at: [http://adni.loni.usc.edu/wp-](http://adni.loni.usc.edu/wp-content/uploads/how_to_apply/ADNI_Acknowledgement_List.pdf)  
17 [content/uploads/how\\_to\\_apply/ADNI\\_Acknowledgement\\_List.pdf](http://adni.loni.usc.edu/wp-content/uploads/how_to_apply/ADNI_Acknowledgement_List.pdf)

18

19 **Affiliations**

20 <sup>1</sup> Department of Complex Trait Genetics, Center for Neurogenomics and Cognitive Research,  
21 Amsterdam Neuroscience, VU University Amsterdam, Amsterdam, The Netherlands

22 <sup>2</sup> Brain Center Rudolf Magnus, Department of Neurology, University Medical Center  
23 Utrecht, Utrecht, The Netherlands

24 <sup>3</sup> Brain Center Rudolf Magnus, Department of Psychiatry, University Medical Center  
25 Utrecht, Utrecht, The Netherlands

26 <sup>4</sup> Department of Neuroscience, Brighton and Sussex Medical School, University of Sussex,  
27 Brighton, East Sussex, UK

28 <sup>5</sup> Neuroimaging Laboratory, Santa Lucia Foundation IRCCS, Rome, Italy

29 <sup>6</sup> Department of Psychiatry, University of Muenster, Muenster, Germany

30 <sup>7</sup> Research Center Military Mental Healthcare, Utrecht, The Netherlands

31 <sup>8</sup> Erasmus University Medical Center, Rotterdam, The Netherlands

32 <sup>9</sup> Department of Child and Adolescent Psychiatry/Psychology, Erasmus University Medical  
33 Center - Sophia Children's Hospital, Rotterdam, The Netherlands

34 <sup>10</sup> Department of Neuroradiology & TUM-Neuroimaging Center (TUM-NIC), Klinikum  
35 rechts der Isar, Technische Universität München, Munich, Germany

36 <sup>11</sup> Graduate School of Systemic Neurosciences GSN, Ludwig-Maximilians-Universität,  
37 Biocenter, Munich, Germany

38 <sup>12</sup> Departament de Psicologia Clínica i Psicobiologia, Universitat de Barcelona, Barcelona,  
39 Spain

40 <sup>13</sup> Institut de Neurociències, Universitat de Barcelona, Barcelona, Spain

41 <sup>14</sup> Institut de Recerca Pediàtrica Hospital Sant Joan de Déu. Esplugues de Llobregat,  
42 Barcelona, Spain

43 <sup>15</sup> Wellcome EPSRC Centre for Interventional and Surgical Sciences (WEISS), University  
44 College London, London, United Kingdom

45 <sup>16</sup> Center for Neurobehavioral Genetics, University of California Los Angeles, Los Angeles,  
46 USA

47 <sup>17</sup> Department of Psychiatry, Icahn School of Medicine at Mount Sinai, New York, USA

48 <sup>18</sup> Department of Clinical Genetics, Amsterdam Neuroscience, VU University Medical  
49 Center, Amsterdam, The Netherlands

50

51 **Corresponding author**

52 Martijn P. van den Heuvel

53 Department of Complex Trait Genetics, Center for Neurogenomics and Cognitive Research,

54 Amsterdam Neuroscience, VU University Amsterdam, De Boelelaan 1085, 1081 HV

55 Amsterdam, The Netherland

56 Department of Clinical Genetics, Amsterdam Neuroscience, VU University Medical Center,

57 De Boelelaan 1117, 1081 HV Amsterdam, The Netherlands

58 E-mail address: [m.p.vanden.heuvel@vu.nl](mailto:m.p.vanden.heuvel@vu.nl)

59

60 **Abstract**

61 Macroscale white matter pathways form the infrastructure for large-scale communication in

62 the human brain, a prerequisite for healthy brain function. Conversely, disruptions in the

63 brain's connectivity architecture are thought to play an important role in a wide range of

64 psychiatric and neurological brain disorders. Here we show that especially connections

65 important for global communication and network integration are involved in a wide range of

66 brain disorders. We report on a meta-analytic connectome study comprising in total 895

67 patients and 1,016 controls across twelve neurological and psychiatric disorders. We

68 extracted disorder connectome fingerprints for each of these twelve disorders, which were

69 then combined into a cross-disorder disconnectivity involvement map, representing the

70 involvement of each brain pathway across brain disorders. Our findings show connections

71 central to the brain's infrastructure are disproportionately involved across a wide range of

72 disorders. Connections critical for global network communication and integration display

73 high disturbance across disorders, suggesting a general cross-disorder involvement and

74 importance of these pathways in normal function. Taken together, our cross-disorder study

75 suggests a convergence of disconnectivity across disorders to a partially shared  
76 disconnectivity substrate of central connections.

77

## 78 **Background**

79 The macroscale connectome is the anatomical substrate for effective communication and  
80 integration of information between brain regions <sup>1,2</sup>. Highly connected brain regions have a  
81 central role in this infrastructure forming a densely interconnected rich club core <sup>4,5</sup>. This  
82 centralization of connectivity has been argued to provide several benefits for global neural  
83 integration <sup>6-8</sup> and with that healthy brain function <sup>9,10</sup>. However, due to their central  
84 embedding in the network, hub regions and associated connections have also been suggested  
85 to be generally vulnerable to network disruption <sup>11</sup> and, as a result, disproportionately involved  
86 in a wide range of brain disorders <sup>12</sup>.

87

88 Disease-associated alterations in structural and functional brain connectivity have been  
89 observed across a wide range of neurological and psychiatric disorders <sup>13,14</sup>. Potentially, these  
90 disconnectivity patterns converge across disorders to the hypothesized vulnerable substrate of  
91 central connections. Such convergence is further suggested by observations that multiple  
92 neuropsychiatric disorders involve overlapping neural circuits <sup>15,16</sup>, share genetic risk factors  
93 <sup>17-19</sup>, and display high comorbidity <sup>20</sup> and shared brain phenotypes <sup>16</sup>. However, so far,  
94 disease connectome studies have mostly been focused on single or small sets of disorders,  
95 and do not provide discriminative power to identify cross-disorder biological patterns of  
96 white matter disconnectivity <sup>21,22</sup>.

97

98 Combining diffusion MRI data from studies on psychiatric and neurological disorders  
99 provides new opportunities to assess the vulnerability of central connections in the human

100 brain. Here, we performed a cross-disorder data analysis, integrating connectivity alterations  
101 in a dataset comprising diffusion MRI data of in total 895 patients and 1,016 matched  
102 controls across twelve different brain disorders. These include eight psychiatric disorders  
103 (schizophrenia, bipolar disorder, attention deficit hyperactivity disorder, autism spectrum  
104 disorder, major depressive disorder, obesity, obsessive-compulsive disorder, posttraumatic  
105 stress disorder) and four neurological disorders (Alzheimer’s disease and its prodromal stage  
106 known as mild cognitive impairment, amyotrophic lateral sclerosis and primary lateral  
107 sclerosis). By combining disconnectivity maps of these twelve brain disorders we constructed  
108 a ‘cross-disorder involvement map’, identifying the set of white matter pathways that show  
109 involvement in multiple brain disorders. We combine this cross-disorder map with results  
110 from network analysis of the human connectome and show that connections important for  
111 neural integration are disproportionally involved across a range of disease processes.

112

## 113 **Results**

### 114 *Cross-disorder involvement map*

115 We examined MRI data of 2,681 patients and controls across twelve brain disorders from  
116 previously published studies and cohorts. Based on diffusion MRI data, white matter  
117 pathways were reconstructed in all subjects and combined with individual T1 data into  
118 connectome maps. Connectome maps were reconstructed according to a subdivision of the  
119 Desikan-Killiany atlas (DK-219). Results obtained using a second, different, parcellation of  
120 the Desikan-Killiany atlas (DK-114) are described below in the robustness analyses section.  
121 Quality control and patient-control matching was performed per study (see Methods) after  
122 which 895 patients and 1,016 matched controls were included for analysis. An overview of  
123 the demographics is provided in Figure 1 and Table 1. For each disorder, connectivity  
124 alterations were estimated in disconnectivity maps quantifying the differences in connectivity

125 strength (fractional anisotropy) between patients and controls. Disconnectivity maps were  
126 constructed per dataset to ensure patients and controls were matched and aggregated into 12  
127 disorders disconnectivity maps (Figure 2A). In each disorder, the top 15 % connections with  
128 highest disconnectivity effects were selected as disorder “involved”. A fixed number of  
129 connections was selected in each disorder to ensure equal presence of all disorders in the final  
130 cross-disorder involvement map.

131

132 Combining all individual disease maps, a group cross-disorder involvement map was then  
133 formed by the percentage of disorders in which a connection was considered “disorder  
134 involved” (Figure 2B). Network based statistics showed significantly large subnetworks of  
135 connections with cross-disorder involvement above 35%, 40% and 45% (all  $p < 0.05$ , Figure  
136 SI 1). The largest subnetwork contained of 34 regions and 82 connections, including  
137 connections of the caudal anterior cingulate, caudal middle frontal, paracentral, posterior  
138 cingulate, precentral, precuneus, superior frontal and superior parietal regions ( $p = 0.0003$ ,  
139 Figure 2E). Averaging cross-disorder involvement of adjacent connections to each region  
140 provided a measure of region-wise cross-disorder involvement (Figure 2D). Regions with  
141 significantly high cross-disorder involvement included sub-regions of the postcentral gyrus  
142 ( $\times 2.23$  more than in permuted cross-disorder involvement maps,  $p = 0.0109$ , FDR-corrected)  
143 and precentral gyrus ( $\times 2.19$  higher,  $p = 0.0109$ , FDR-corrected).

144

145 *Network measures*

146 *Rich club organization*

147 The vulnerability of the central rich club connections to disease effects was tested with  
148 respect to a rich club core of hub regions identified as the top 15% highest degree regions in  
149 the reference connectome map (degree  $> 14$ , Figure SI 2). Based on the identified rich club

150 core, 7.6% of the network connections were classified as *rich club connections*, describing  
151 connections spanning between hub regions, 27.7% as *feeder connections*, describing  
152 connections spanning between hub and peripheral regions and 64.7% as *local connections*,  
153 describing connections between peripheral regions. Significant disproportional cross-disorder  
154 involvement was seen among rich club connections as compared to local connections (24%  
155 higher,  $p = 0.0041$ , Figure 3) and, to a lesser extent, as compared to feeder connections (17%  
156 higher,  $p = 0.0325$ ). No specific increase was observed among feeder compared to local  
157 connections ( $p = 0.1209$ ).

158

### 159 *Edge-wise centrality measures*

160 We investigated the vulnerability of central connections by examining the cross-disorder  
161 involvement of 25% most central connections identified by edge-wise centrality measures.  
162 The importance of connections for global network integration was measured by the edge-  
163 betweenness centrality, counting the number of shortest topological paths through each  
164 connection. Connections with high betweenness centrality were significantly more often  
165 involved across disorders than in randomized cross-disorder involvement maps (27% higher,  
166  $p = 0.0001$ , Figure 4). An extended definition of global network integration is given by  
167 network communicability which considers all possible walks between nodes in the network.  
168 Connections with large edge-removal effect on the network communicability also showed  
169 significantly higher cross-disorder involvement (12% higher,  $p = 0.0304$ ), further suggesting  
170 disproportionately high cross-disorder effects in connections central for global  
171 communication. In contrast, connections with strong contribution to local network  
172 organization, measured by the network clustering coefficient, did not show a predisposition  
173 for cross-disorder involvement ( $p = 0.7330$ ). Finally, cross-disorder involvement was 42%

174 increased among spatially long connections (>50 mm) in comparison with cross-disorder  
175 involvement maps with permuted disconnectivity effects ( $p < 0.0001$ ).

176

### 177 *Global FA effects*

178 To verify independence of the association between network measures and cross-disorder  
179 involvement from global FA differences (as often reported in case-control studies<sup>60,61</sup>),  
180 additional permutation testing was performed in which subject labels were permuted, with  
181 now, per disease and dataset, the global FA distribution in patient and control groups  
182 preserved. Connections with high betweenness centrality again showed significantly higher  
183 cross-disorder involvement (24% increase,  $p < 0.0001$ ). Connections with high edge-removal  
184 effect on network communicability also showed significantly higher cross-disorder  
185 involvement (13% increase,  $p = 0.0092$ ). Cross-disorder involvement was also higher among  
186 the spatially longest connections (>50 mm), with a 36% higher cross-disorder involvement as  
187 compared to short connections (<50 mm,  $p < 0.0001$ ).

188

### 189 *Robustness analyses*

190 High rich club involvement was also observed when classification of rich club, feeder and  
191 local connections were based on a smaller (7% or 9% highest degree regions) or larger set of  
192 hub regions (18% or 25% highest degree regions). For all sets of hub regions, the associated  
193 rich club connections showed significantly higher cross-disorder involvement than the  
194 associated local connections (24% - 26% higher, all  $p < 0.05$ , Figure SI 3). Also, rich club  
195 connections showed significantly higher cross-disorder involvement compared to feeder  
196 connections (14% - 22% higher, all  $p < 0.05$ , Figure SI 3) when connection classes were  
197 based on a smaller (9%) or larger set of hub regions (18% or 25%).

198



199 The results obtained using central connections selected as the top 25% connections with  
200 highest edge-wise centrality scores showed exemplarily for a range of percentages (5% -  
201 45%) of central connections (Figure SI 4). Both smaller (10% and 15%) and larger sets (30%  
202 - 45%) of connections with high edge betweenness showed significantly higher cross-  
203 disorder involvement than seen in randomized cross-disorder involvement maps (18% - 32%  
204 higher, all  $p < 0.05$ ). For central connections identified by edge-removal effect on  
205 communicability, larger sets of central connections (30% - 45%) showed significantly higher  
206 cross-disorder involvement than in randomized cross-disorder involvement maps (11% - 12%  
207 higher, all  $p < 0.05$ ). Connections selected by their spatial wiring length showed at all  
208 percentages (5% - 45%) significantly higher than expected cross-disorder involvement (25%  
209 - 61% higher, all  $p < 0.05$ ).

210

211 In each disorder, a fixed number of connections (15% of the connections in the reference  
212 connectome map) was selected as disorder involved to ensure equal contribution of all  
213 disorders to the cross-disorder involvement map. Validating the results obtained by selecting  
214 15% of the connections as disorder involved, showed similar results at other reasonable  
215 percentages of disorder involved connections (5%, 10%, 20% and 25%, Figure SI 5). Rich  
216 club connections showed significantly higher cross-disorder involvement compared with  
217 local connections at all percentages (13% - 37% higher, all  $p < 0.05$ ). Compared with feeder  
218 connections, rich club connections showed significantly higher cross-disorder involvement at  
219 the strict 5% (32% higher,  $p = 0.0241$ ) and 10% (24% higher,  $p = 0.0135$ ) percentages.  
220 Moreover, significantly increased cross-disorder involvement was observed among central  
221 connections selected by edge betweenness (18% - 42% higher, all  $p < 0.05$ ) and spatial  
222 wiring length (30% - 63% higher, all  $p < 0.05$ ) at all percentages. Central connections  
223 selected by edge-removal effect on communicability showed significantly higher cross-

224 disorder involvement, when selecting the stricter set of 10% of the connections as disorder  
225 involved (15% higher,  $p = 0.0288$ ).

226

227 To verify that the results were not driven by a single disorder, we performed a leave-one-out  
228 analysis in which all analyses were repeated leaving out one disorder at a time  
229 (Supplementary Materials). Results of the leave-one-out analysis showed in all iterations  
230 significantly higher cross-disorder involvement of rich club connections relative to local  
231 connections but not relative to feeder connections. The association between central  
232 connections selected by edge betweenness, edge-removal effect on communicability and  
233 spatial wiring length remained significant in all iterations (all  $p < 0.05$ , see Supplementary  
234 Materials).

235

236 Using a second parcellation atlas, we further investigated cross-disorder involvement of  
237 connections (Supplementary Materials). First, repeating the analysis revealed a subnetwork  
238 of connections with increased cross-disorder involvement similar to the network reported in  
239 the main analysis ( $p = 0.0002$ ). Second, testing the vulnerability of central connections  
240 confirmed the strong findings of the main text including: significantly higher cross-disorder  
241 involvement of rich club connections compared to local connections ( $p = 0.0207$ ) and  
242 strongly elevated cross-disorder involvement was observed among connections with high  
243 betweenness scores ( $p = 0.0018$ ) and spatial wiring length ( $p = 0.0001$ ).

244

## 245 **Discussion**

246 Our findings show that connections central to network integration and communication in the  
247 human brain are hotspots for white matter disconnectivity. Cross-disorder disconnectivity  
248 was examined in 895 patients and 1,016 matched controls across a range of twelve

249 psychiatric and neurological disorders. Our findings provide three lines of evidence that  
250 support a general vulnerability of central connections.

251

252 First, rich club connections showed significantly higher cross-disorder involvement as  
253 compared to connections of peripheral regions (Figure 3). This observation is in line with  
254 studies showing the involvement of hub regions in specific disorders, such as schizophrenia  
255 <sup>62</sup>, autism spectrum disorder <sup>63</sup>, ADHD <sup>63</sup>, Huntington's disease <sup>64</sup>, Alzheimer's disease <sup>65-67</sup>,  
256 and general white matter lesions <sup>68</sup>. High involvement of rich club connections across  
257 disorders is further in line with studies on cross-disorder gray matter abnormalities. A large  
258 voxel-based morphometry meta-analysis showed hub regions to be disproportionately  
259 involved in anatomical abnormalities across clinical brain disorders <sup>12</sup>, findings verified by  
260 voxel-based morphometry meta-analysis across clinical psychiatric disorders, showing shared  
261 gray matter loss in in particular dorsal anterior cingulate and insula hub regions <sup>15</sup>.

262

263 Second, edgewise network measures revealed connections critical for network efficiency and  
264 communicability to display high cross-disorder involvement (Figure 4). This result extends  
265 earlier reported decreased efficiency of structural networks in for example depression <sup>65</sup> and  
266 in Alzheimer's disease, schizophrenia, multiple sclerosis and ALS (see <sup>22</sup> for a review),  
267 suggesting that these effects are not disease-specific, but perhaps more general to brain  
268 disorders than previously reported. Furthermore, these results stress the hypothesized  
269 importance of efficient integration of information for healthy brain function <sup>3</sup>, with  
270 disruptions in central connections potentially leading to disproportional effects in brain  
271 dysfunction.

272

273 A third line of evidence for the vulnerability of central connections is the observation of high  
274 cross-disorder involvement among connections spanning long physical distances (Figure 4).  
275 This observation is in line with studies reporting affected long fiber tracts including the  
276 superior and inferior longitudinal fasciculus in for example ADHD <sup>69</sup>, ASD <sup>70</sup>, OCD <sup>71</sup>, and  
277 schizophrenia <sup>72,73</sup>. Post-hoc analysis showed these effects to be reduced when restricting the  
278 analysis to intrahemispheric connectivity of either the left (19% increase,  $p = 0.0190$ ) and  
279 right hemisphere ( $p = 0.0743$  (n.s.)), suggesting high cross-disorder involvement of spatially  
280 long connections to be partly driven by a clustering of effects among interhemispheric  
281 connections.

282

283 The observed cross-disorder effects are likely to reflect the combination of multiple disease  
284 mechanisms that differ across disorders <sup>74,75</sup>. Central regions and connections have been  
285 argued to be biologically expensive, characterized by complex neuronal architecture <sup>76</sup>, high  
286 metabolism <sup>3</sup> and high neuronal activity <sup>77</sup>. This high biological cost might result in increased  
287 vulnerability to a wide range of disease processes, such as a toxic environment or reductions  
288 in the supply of oxygen or other metabolic resources <sup>78</sup>. Central connections may also display  
289 a high cross-disorder involvement as the result of their topological centrality and associated  
290 risk to propagating disease processes <sup>75,79</sup>. Connectome studies of disconnectivity in ALS <sup>80</sup>,  
291 Alzheimer's disease <sup>79,81,82</sup> and frontal temporal dementia <sup>82</sup> have suggested a prion-type of  
292 spread of disease processes in neurodegenerative disorders with specifically early disease  
293 involvement of hub regions and rich club connections due to their central embedding in the  
294 network. In addition to this, long-range central connections may be particularly vulnerable to  
295 focal white matter degeneration. The chance of focal degeneration is proportional to fiber  
296 length, making long-range central connections in total more vulnerable to general white  
297 matter atrophy as compared to short range connections. Rich club connections have also been

298 shown to display a prolonged development<sup>83–85</sup>, which may further increase their general  
299 vulnerability by putting these connections at risk to late neurodevelopmental stress, substance  
300 use and dysregulation of hypothalamic-pituitary-adrenal axis function<sup>74,86</sup>. The shared  
301 vulnerability of central connections across disorders might result from the importance of  
302 central connections for cognitive function<sup>4,87</sup>. Cognitive impairment is shared across the  
303 symptomatology of many brain disorders<sup>88</sup>. Hence, if in each disorder separately  
304 disconnectivity of central connections is associated with deficits in cognitive function, then  
305 such overlap in symptomatology would result in general vulnerability of central connections.  
306  
307 Genetics and heritability studies offer the potential to gain further understanding in the  
308 pathology underlying cross-disorder disconnectivity. Shared genetic etiology is observed  
309 across many psychiatric and neurological disorders<sup>17,89,90</sup>, with shared genetic risk factors  
310 providing converging evidence for common underlying biological processes across brain  
311 disorders<sup>16,17,91</sup>. Further exploring structural disconnectivity and genetic information in a  
312 multi-modal and cross-disorder approach may further identify cross-disorder as well as  
313 disorder-specific biological pathways<sup>16,92–94</sup>.  
314  
315 The observation of overlapping disconnectivity patterns across brain disorders is in  
316 agreement with the hypothesis that brain disorders are interrelated<sup>17</sup> and prompts for a  
317 careful consideration of disease disconnectivity findings. Disconnectivity findings of single-  
318 disorder connectome examinations may often be interpreted as disorder-specific  
319 disconnectivity effects, which might not fully be the case considering the demonstrated  
320 overlap in effects across disorders. This misattribution is perhaps most problematic in the  
321 development of biomarkers for brain disorders based on disconnectivity fingerprints, where it  
322 could result in overestimation of the disorder specificity of a presented biomarker.

323

324 Methodological issues have to be considered when interpreting our findings. While  
325 combining data from multiple studies may implicitly account for real-world heterogeneity  
326 and improve generalizability of observed results<sup>95</sup>, it is likely that combining data from  
327 multiple studies may also reduce statistical power as a result of inter-study heterogeneity in  
328 diagnoses, demographics, scanner and MRI acquisition protocols. We are aware of this  
329 limitation and aimed to minimize the influence of study specific properties by directly  
330 comparing control and patient data within each study first, before combining information  
331 across the twelve disorders. Second, disorder disconnectivity fingerprints were based on  
332 structural brain networks obtained by diffusion-based MRI, with white matter microstructural  
333 integrity assessed by means of the metric of fractional anisotropy<sup>47</sup>. Fractional anisotropy is  
334 however only an indirect marker of the micro-scale neuroarchitecture and diffusion weighted  
335 imaging has recognized limitations with respect to the reconstruction of complex fibers and  
336 connectome mapping<sup>45,96,97</sup>, which might result in underestimation of disconnectivity effects  
337 within and across disorders. Third, our conclusions are based on effects seen across twelve  
338 disorders, and it remains unclear whether our conclusions could be generalized to an even  
339 wider range of brain disorders. To verify that the results were not driven by a single disorder,  
340 we performed a leave-one-out validation analysis in which all analyses were repeated leaving  
341 out one disorder at a time. Moreover, we possibly missed smaller sets of disorders that share  
342 disconnectivity patterns. Investigating potential clustering of disorders based on their  
343 disconnectivity patterns would be of great interest to further provide new insights in more  
344 detailed biological relationships between disorders.

345

346 Our findings suggest shared connectome pathology across neurological and psychiatric  
347 disorders, with in particular high general vulnerability of connections central to neural

348 communication and integration. Beyond identifying cross-disorder disconnectivity, cross-  
349 disorder examination has the important potential to show distinct disconnectivity patterns  
350 between disorders. Future examination into both disorder-shared and disorder-specific  
351 disconnectivity effects provides better understanding of which brain alterations are general  
352 and which effects are unique for brain disorders, providing new ways for the development of  
353 MRI based biomarkers for psychiatric and neurological disorders.

354

## 355 **Methods**

### 356 *Studies and subjects*

357 Diffusion MRI data of 2,681 patients and controls of twelve disorders were included. Data  
358 included diffusion-weighted imaging (DWI) data of previously reported studies on  
359 schizophrenia (two datasets available, set I and II) <sup>23,24</sup>, bipolar disorder <sup>25</sup>, attention deficit  
360 hyperactivity disorder (ADHD) <sup>26</sup>, autism spectrum disorder (ASD) <sup>26</sup>, major depressive  
361 disorder (MDD) <sup>27</sup>, obesity, obsessive-compulsive disorder (OCD) <sup>28</sup>, posttraumatic stress  
362 disorder (PTSD, two datasets, set I and set II) (ADNI-DOD [adni.loni.usc.edu](http://adni.loni.usc.edu) and <sup>29</sup>), and  
363 four neurological disorders, Alzheimer's disease (AD, two datasets, set I and set II) (ADNI  
364 and <sup>30,31</sup>), mild cognitive impairment (MCI, two datasets, set I and set II) (ADNI and <sup>30,31</sup>),  
365 amyotrophic lateral sclerosis (ALS) <sup>32-34</sup> and primary lateral sclerosis (PLS) <sup>32-34</sup>. Figure 1  
366 provides an overview of all data included and a summary is provided in Table 1. Further  
367 details including a description of MRI acquisition protocols and demographics are outlined in  
368 the Supplementary Materials. Within each dataset, patients and controls were matched on  
369 age, sex, scanner settings and where possible other demographics (procedure described in the  
370 Supplementary Materials).

371

### 372 *Data processing*

373 *DWI Tractography*. Data preprocessing of DWI and T1-weighted images of individuals  
374 included the following steps: the anatomical T1-weighted image was parcellated into 219  
375 distinct cortical regions (111 left-hemispheric and 108 right-hemispheric regions) according  
376 to a subdivision of FreeSurfer's Desikan-Killiany atlas<sup>35,36</sup> using FreeSurfer<sup>37</sup>. Using a  
377 second different parcellation of the Desikan-Killiany atlas (DK-114) showed similar results  
378 presented in the robustness analyses section and Supplemental Materials. Second, the  
379 individual parcellation map was co-registered to the DWI data using an affine transformation  
380 mapping of the T1-weighted image to the DWI image. Third, diffusion-weighted images  
381 were corrected for eddy current distortions and head motion using the FMRIB Software  
382 Library<sup>38</sup>. If reversed phase encoding data was available (datasets listed in SI Table 1),  
383 susceptibility induced distortions were estimated and incorporated in the preprocessing<sup>39</sup>.  
384 Fourth, a tensor was fitted to the diffusion signals in each voxel using a robust tensor fitting  
385 algorithm<sup>40</sup> and subsequently fractional anisotropy (FA) was derived<sup>41</sup>. Given the mostly  
386 clinical diffusion MRI protocols used for data acquisition, simple deterministic tensor  
387 reconstruction (DTI) (as compared to more advanced diffusion profile reconstruction  
388 methods) was used to minimize the potential influence of false positives on network  
389 reconstruction and subsequent computation of network metrics<sup>42-44</sup>. This relatively simple  
390 reconstruction of the diffusion signal is a limitation of our cross-disorder examination,  
391 potentially leading to incomplete reconstruction of complex fiber pathways and an  
392 underestimation of cross-disorder disease effects<sup>45</sup>. Fifth, white matter pathways were  
393 reconstructed using fiber assignment by continuous tracking (FACT)<sup>46</sup>, with streamline  
394 reconstruction starting from eight seeds in every cerebral white matter voxel. Fiber tracking  
395 was continued until a streamline showed high curvature ( $> 45^\circ$ ), exited the brain mask, or  
396 when a streamline entered a voxel with low fractional anisotropy ( $< 0.1$ ). The mean FA value



397 of a streamline was computed as the weighted average FA value over all voxels that a  
398 streamline passed.

399

400 *Network reconstruction.* For each individual dataset, reconstructed streamlines and cortical  
401 parcellation were combined into a weighted network. The 219 cortical areas were chosen as  
402 nodes in the network and two regions were considered connected if at least one reconstructed  
403 streamline was found to touch both cortical regions. The weight of connections was taken as  
404 the mean fractional anisotropy (FA) of streamlines involved <sup>47</sup>.

405

#### 406 ***Cross-disorder analysis***

407 Cross-disorder examination of disorder-related disconnectivity was performed in two steps.  
408 Patient and control data were *first* compared *within* each dataset (in contrast to the alternative  
409 of pooling all data into one large dataset) to ensure that patients and controls were matched  
410 on age, sex and other demographics and scanner settings. This comparison provided for each  
411 disorder a disconnectivity map quantifying the differences in connectivity strength between  
412 patients and matched controls. *Second*, disorder disconnectivity maps were combined *across*  
413 the twelve disorders to determine the distribution of disconnectivity effects across network  
414 connections of the brain. This two-step approach optimized comparability of data across  
415 studies with different MRI acquisition protocols. In what follows, we describe this procedure  
416 in more detail, including the construction of the disorder disconnectivity maps and the cross-  
417 disorder involvement map, followed by the performed statistical analyses.

418

#### 419 *Step 1: Disorder disconnectivity map*

420 Per disorder, a disconnectivity map was constructed by assessing the between-group  
421 difference in FA of connections between patients and controls quantified by a Student's t-test

422 statistic. As such, we tested for lowered FA connectivity strength in the patient group  
423 compared to the controls. Between-group analysis was performed for connections that were  
424 present in 30% or more of the population of controls and patients to ensure sufficient  
425 statistical power<sup>33</sup>. To correct for possible differences in degrees of freedom across  
426 connections, t-test statistics were transformed to z-scores.

427 For the disorders PTSD, schizophrenia, Alzheimer's disease and MCI, for which  
428 multiple datasets were available, a disorder disconnectivity map was first calculated *per*  
429 *dataset* and then combined into an average disorder disconnectivity map using Stouffer's  
430 method for combining independent tests by averaging the z-scores in the disorder  
431 disconnectivity maps across datasets<sup>48,49</sup>.

432 In total, this resulted in a disorder disconnectivity map for each of the 12 included  
433 brain disorders. Next, the top 15% connections with highest z-scores were selected as the set  
434 of most involved connections in that disorder, performing, per disorder, a proportional  
435 thresholding on the disorder-specific disconnectivity map with a density of 15%<sup>50</sup>. Results  
436 using 5%, 10%, 20% or 25% involved connections are presented in the robustness analyses  
437 section.

438

#### 439 *Step 2: Cross-disorder involvement map*

440 The twelve thresholded disorder disconnectivity maps were combined into a total *cross-*  
441 *disorder involvement map*. To maximize comparability across studies and to avoid any  
442 potential bias to one of the included datasets, connection effects were included for those  
443 connections present in a reference group connectome map based on high-quality data of the  
444 Human Connectome Project (HCP, 500 Subjects Release of the Human Connectome Project)  
445 <sup>51,52</sup> (see Supplementary Materials for details on the HCP group connectome reconstruction).  
446 Finally, a *cross-disorder involvement map* was formed by adding up all thresholded disorder

447 disconnectivity maps and dividing it by the number of disorders in which each connection  
448 was present, thus computing per connection the percentage of disorders in which this  
449 connection was involved.

450

#### 451 *Network analysis*

452 The centrality of connections in the network structure was considered with respect to rich  
453 club organization, edgewise global and local network measures and physical wiring length.  
454 Metrics were computed on the HCP group connectome to ensure independence of the  
455 examined datasets.

456 *Rich club organization.* Central connections were identified with respect to the rich  
457 club organization describing the collective of high-degree hub regions <sup>4</sup>. Regional degree was  
458 computed on the basis of the HCP group connectome with hub regions selected as regions  
459 with a degree above 14 (top 13% regions with the highest regional degree, 29 regions, Figure  
460 3, listed in SI Table 2). This set of regions was verified to display a rich club organization,  
461 showing a higher-than-expected level of interconnectivity ( $p < 0.0001$ , compared with 10,000  
462 degree-preserved rewired networks using permutation testing).

463 Based on the identified rich club organization, network connections were classified  
464 into *rich club connections*, describing connections spanning between hub regions, *feeder*  
465 *connections*, describing connections spanning between hub and peripheral regions, or *local*  
466 *connections*, describing connections between peripheral regions <sup>6</sup>. Analyses were repeated  
467 with connections classes derived from a smaller and larger set of hub regions (top 7% highest  
468 degree regions, degree  $> 16$ ; top 9% highest degree regions, degree  $> 15$ ; top 18% highest  
469 degree regions, degree  $> 13$  and top 25% highest degree regions, degree  $> 12$ ).

470 *Global network organization.* Global network integration was examined from the  
471 perspective of the ease of communication between nodes in the network. First, the centrality

472 of connections with respect to the shortest topological paths in the network was measured by  
473 counting the number of shortest topological paths through each network connection using the  
474 metric of edge betweenness<sup>53</sup>. Second, network integration was considered by examining the  
475 metric of network communicability, measuring all possible walks between nodes<sup>54</sup>. The  
476 contribution of connections to communicability was assessed by edge-removal statistics<sup>55–57</sup>.  
477 Removal-effect of each connection on network communicability was quantified as the  
478 difference (in terms of percentage) between the network communicability before and after  
479 removal of a connection.

480 *Local network organization.* The role of network connections in local network  
481 organization was assessed through the contribution of each connection to *network clustering*  
482<sup>53</sup>. The removal-effect of each connection on global network clustering was quantified as the  
483 difference (i.e., percentage of change) in global clustering before and after removal of the  
484 connection.

485 *Spatial embedding.* Projection length of each connection was calculated as the  
486 average physical length of a connection.

487

488 *Statistical analysis*

489 *Cross-disorder involvement.* Significant subnetworks in the brain with increased cross-  
490 disorder involvement levels were identified using Network Based Statistics<sup>59</sup>. The cross-  
491 disorder involvement map was binarized by including connections with cross-disorder  
492 involvement percentages above a specified NBS-threshold. Multiple NBS-thresholds (0%,  
493 5%, ..., 100%) were considered, capturing the trade-off between specificity and sensitivity of  
494 the NBS-analysis. The number of connections in the greatest component of the thresholded  
495 network was counted. Significance of this cluster was assessed using permutation testing by  
496 comparison with the distribution of greatest component sizes in a null condition in which

497 disease effects were randomized. For this, for each permutation, a cross-disorder involvement  
498 map was calculated on a permuted subject sample in which subject labels (i.e. controls and  
499 patients) were randomly reassigned (keeping patient and control group sizes intact). 10,000  
500 permutations were examined and the percentage of the permutations in which the greatest  
501 component was larger or equal to the observed greatest component was assigned as p-value  
502 to the observed cross-disorder involvement. Regions with significantly high cross-disorder  
503 involvement were similarly identified by comparison with the sample of subject-label  
504 permuted cross-disorder involvement maps. To correct for multiple testing, p-values were  
505 adjusted by the false discovery rate correction procedure <sup>58</sup>.

506

507 *Network measures.* Differences in mean cross-disorder involvement between rich club  
508 and feeder, rich club and local, and feeder and local connection classes were statistically  
509 assessed using permutation testing (10,000 permutations). In each permutation, connection  
510 class labels were randomly shuffled and mean cross-disorder involvement of the classes was  
511 computed over the permuted connections. Differences in cross-disorder involvement between  
512 connection classes were computed for all permutations. The observed difference in cross-  
513 disorder involvement between two connection classes was assigned a p-value by computing  
514 the percentage of permutations in which the difference between the two connection classes  
515 was equal to or exceeded the observed difference.

516 The 25% connections most central connections selected by global network  
517 integration, local network integration and the spatial embedding were examined. Exploring  
518 other reasonable percentages (5%, 10%, ..., 45%) for selecting central connections showed  
519 consistent results that are reported in the robustness analyses. Cross-disorder involvement  
520 levels were compared with the levels expected when disconnectivity was randomly  
521 distributed using permutation testing, this to verify independence of our results from

522 connection properties such as connection prevalence or group-average connection strength.  
523 For each permutation, subject labels were randomly reassigned and cross-disorder  
524 involvement maps were calculated using the permuted subject-labeling. 10,000 permutations  
525 were computed and cross-disorder involvement levels of the subsets of central connections  
526 were calculated for each permutation. Based on this null distribution, the original effect was  
527 assigned a p-value as the percentage of permutations in which the cross-disorder involvement  
528 was equal to or exceeded the observed cross-disorder involvement.

529

### 530 *Global FA effects*

531 Additional permutation testing was performed to verify independence of our results from  
532 global FA differences that are often reported in case-control studies<sup>60,61</sup>. For each subject,  
533 global FA was computed as the total FA strength of all connections. Next, subjects were  
534 classified into ten global FA groups, group one with global FA in the interval [0, 0.1), group  
535 two with global FA in the interval [0.1, 0.2), etc. For permutation testing, subject labels were  
536 permuted within datasets, but now under the constraint of only allowing switching patient  
537 and control labels of subjects assigned to the same global FA bin. As such, the resulting  
538 global FA distribution of permuted patient and control groups was kept similar to the original  
539 global FA distributions (and therewith also potential between-group differences in global  
540 FA). 10,000 permutations were computed and, in each permutation, the cross-disorder  
541 involvement of the subsets of connections was calculated. Observed effects were assigned a  
542 p-value as the percentage of the permutations in which the measured effect was equal to or  
543 exceeded the observed effect.

544

545

### 546 **Acknowledgements**

547 M.P. van den Heuvel was funded by an ALW open (ALWOP.179) and VIDI (452-16-015)  
548 grant from the Netherlands Organization for Scientific Research (NWO) and a Fellowship of  
549 MQ.

550

551 The Muenster Depression Cohort was funded by the German Research Foundation (DFG,  
552 grant FOR2107 DA1151/5-1 and DA1151/5-2) to UD; SFB-TRR58, Projects C09 and Z02 to  
553 UD) and the Interdisciplinary Center for Clinical Research (IZKF) of the medical faculty of  
554 Münster (grant Dan3/012/17 to UD).

555

556 Data collection and sharing for this project was funded by the Alzheimer's Disease  
557 Neuroimaging Initiative (ADNI) (National Institutes of Health Grant U01 AG024904) and  
558 DOD ADNI (Department of Defense award number W81XWH-12-2-0012). ADNI is funded  
559 by the National Institute on Aging, the National Institute of Biomedical Imaging and  
560 Bioengineering, and through generous contributions from the following: AbbVie,  
561 Alzheimer's Association; Alzheimer's Drug Discovery Foundation; Araclon Biotech;  
562 BioClinica, Inc.; Biogen; Bristol-Myers Squibb Company; CereSpir, Inc.; Cogstate; Eisai  
563 Inc.; Elan Pharmaceuticals, Inc.; Eli Lilly and Company; EuroImmun; F. Hoffmann-La  
564 Roche Ltd and its affiliated company Genentech, Inc.; Fujirebio; GE Healthcare; IXICO Ltd.;  
565 Janssen Alzheimer Immunotherapy Research & Development, LLC.; Johnson & Johnson  
566 Pharmaceutical Research & Development LLC.; Lumosity; Lundbeck; Merck & Co., Inc.;  
567 Meso Scale Diagnostics, LLC.; NeuroRx Research; Neurotrack Technologies; Novartis  
568 Pharmaceuticals Corporation; Pfizer Inc.; Piramal Imaging; Servier; Takeda Pharmaceutical  
569 Company; and Transition Therapeutics. The Canadian Institutes of Health Research is  
570 providing funds to support ADNI clinical sites in Canada. Private sector contributions are  
571 facilitated by the Foundation for the National Institutes of Health ([www.fnih.org](http://www.fnih.org)). The

572 grantee organization is the Northern California Institute for Research and Education, and the  
573 study is coordinated by the Alzheimer's Therapeutic Research Institute at the University of  
574 Southern California. ADNI data are disseminated by the Laboratory for Neuro Imaging at the  
575 University of Southern California.

576

## 577 **Figures**

578 **Figure 1. Demographics.** Age distribution of controls (top) and patients (bottom) for all  
579 twelve examined disorders. Age ranged between 6 – 90 years. Controls and patients within  
580 datasets were matched on age and gender.

581

582 **Figure 2. Cross-disorder involvement. (A)** Overview of data aggregation and analysis. Per  
583 disorder, a connection-wise disorder-specific disconnectivity map was computed contrasting  
584 the fractional anisotropy of connections in patients and matched controls. Disorder-specific  
585 disconnectivity maps were combined to determine the disconnectivity distribution across  
586 disorders. **(B)** Schematic representation of human reference connectome with connections  
587 colored by cross-disorder involvement. **(C)** Superior (left panel) frontal (right-top panel) and  
588 medial (right-bottom panel) view of brain connectivity colored by cross-disorder  
589 involvement. **(D)** Lateral and medial view of left and right hemispheres showing region-wise  
590 cross-disorder involvement. **(E)** Network including 34 regions (colored blue) that showed  
591 significant involvement across disorders (NBS analysis,  $p = 0.0003$ ).

592

593 **Figure 3. Rich club organization. (A)** Cross-disorder involvement of rich club connections  
594 was significantly 24% higher as compared to the set of local connections ( $p = 0.0041$ ) and  
595 17% higher than observed in the set of feeder connections ( $p = 0.0325$ ). Error bars mark the  
596 standard deviation. **(B)** Hub regions (top 13% highest degree regions, 29 regions) are colored



597 in red. (C) Schematic representation of human reference connectome with rich club  
598 connections (colored red), feeder connections (orange) and local connections (yellow).  
599

600 **Figure 4. Edgewise network measures.** From left to right, average cross-disorder  
601 involvement of connections with highest edge betweenness centrality (top 25% shown),  
602 highest edge-removal effect on communicability, highest edge removal effect on clustering  
603 and long-distance connections. Observed values (blue) were compared with average cross-  
604 disorder involvement in subject-label permuted maps (grey). Connections important for  
605 global topological (edge betweenness centrality, and communicability) and spatial (long-  
606 distance connections) integration showed significantly higher cross-disorder involvement  
607 levels than expected for randomly distributed disease effects (indicated by an asterisk \*,  $p <$   
608 0.05).

609  
610 **Figure SI 1. Subnetworks identified by network based statistics. (A)** Number of regions  
611 in the greatest component in thresholded version of the cross-disorder involvement map  
612 across a range of thresholds (0% - 100% cross-disorder involvement). The greatest  
613 components ranged from including all regions (at 0% cross-disorder involvement threshold)  
614 to including only one region (at 100% cross-disorder involvement threshold). At 35%, 40%  
615 and 45% cross-disorder involvement thresholds, the identified subnetwork showed  
616 significantly larger than subnetwork seen in subject-label permuted cross-disorder  
617 involvement maps (indicated by an asterisk \*,  $p < 0.05$ ). **(B)** Subnetworks and included  
618 regions (in blue) of the three identified significantly large subnetworks.

619

620 **Figure SI 2. Rich club coefficient in reference connectome.** Reference connectome data  
621 showed a significant rich club organization at all degree levels above 8 (indicated by an  
622 asterisk \*,  $p < 0.05$ , FDR-corrected).

623  
624 **Figure SI 3. Rich club organization across percentages of hub regions.** Ratio between  
625 cross-disorder involvement of rich club and local connections (left) and feeder connections  
626 (right). The ratios were evaluated for rich club, feeder and local connections derived from  
627 sets of hub regions selected at different percentages (7%, degree  $> 16$ ; 9%, degree  $> 15$ ; 13%,  
628 degree  $> 14$ ; 18%, degree  $> 13$ ; 25%, degree  $> 12$ ). Percentages at which the ratio was  
629 significantly large (i.e. significant differences in cross-disorder involvement of rich club  
630 connections and feeder or local connections) are indicated by an asterisk \* ( $p < 0.05$ ).

631  
632 **Figure SI 4. Edgewise network measures across percentages of central connections.** The  
633 cross-disorder involvement of central connections (selected by edge betweenness (left), edge-  
634 removal effect on communicability (middle) and spatial wiring length (right)) relative to  
635 cross-disorder involvement observed in subject-label permuted cross-disorder involvement  
636 maps. The relative cross-disorder involvement was obtained at different selection percentages  
637 ranging from considering the top 5% most central connections to the top 45% most central  
638 connections. Percentages at which the ratio was significantly high (i.e. the set of central  
639 connections showed significantly higher cross-disorder involvement than in permuted cross-  
640 disorder involvement maps) are indicated by an asterisk \* ( $p < 0.05$ ).

641  
642 **Figure SI 5. Cross-disorder involvement of central connections across percentages of**  
643 **disorder involved connections.** Results were computed across various percentages of  
644 connections selected as disorder involved in addition to the 15% percentage used in the main

645 analysis. **(A)** The ratio in cross-disorder involvement between rich club and local (left) and  
646 feeder (right) connections. **(B)** The relative cross-disorder involvement of central connections  
647 compared with subject-label permuted cross-disorder involvement maps. Significant effects  
648 are indicated by an asterisk \* ( $p < 0.05$ ).

649

650 **Table 1.** Demographics after data quality control and matching.

651

652 **SI Table 1.** Acquisition parameters of included datasets.

653

654 **SI Table 2.** Number of excluded subjects (because subjects miss information, subjects are  
655 considered outlier, or subjects are not matched) per dataset.

656

657 **SI Table 3.** List of hub regions (region subnumbers are study specific).

658

## 659 **References**

- 660 1. Sporns, O., Tononi, G. & Kötter, R. The human connectome: A structural description  
661 of the human brain. *PLoS Comput. Biol.* **1**, e42 (2005).
- 662 2. Bullmore, E. & Sporns, O. The economy of brain network organization. *Nat. Rev.*  
663 *Neurosci.* **13**, 336 (2012).
- 664 3. Bullmore, E. & Sporns, O. The economy of brain network organization. *Nat. Rev.*  
665 *Neurosci.* **13**, 336–49 (2012).
- 666 4. van den Heuvel, M. P. & Sporns, O. Rich-Club Organization of the Human  
667 Connectome. *J. Neurosci.* **31**, 15775–15786 (2011).
- 668 5. van den Heuvel, M. P., Bullmore, E. T. & Sporns, O. Comparative Connectomics.  
669 *Trends Cogn. Sci.* (2016). doi:10.1016/j.tics.2016.03.001

- 670 6. van den Heuvel, M. P., Kahn, R. S., Goñi, J. & Sporns, O. High-cost, high-capacity  
671 backbone for global brain communication. *Proc. Natl. Acad. Sci. U. S. A.* **109**, 11372–  
672 7 (2012).
- 673 7. Vertes, P. E., Alexander-Bloch, A. & Bullmore, E. T. Generative models of rich clubs  
674 in Hebbian neuronal networks and large-scale human brain networks. *Philos. Trans. R.*  
675 *Soc. B Biol. Sci.* **369**, 20130531–20130531 (2014).
- 676 8. Senden, M., Deco, G., de Reus, M. A., Goebel, R. & van den Heuvel, M. P. Rich club  
677 organization supports a diverse set of functional network configurations. *Neuroimage*  
678 **96C**, 174–182 (2014).
- 679 9. Baggio, H. C. *et al.* Rich Club Organization and Cognitive Performance in Healthy  
680 Older Participants. *J. Cogn. Neurosci.* **27**, 1801–1810 (2015).
- 681 10. Ball, G. *et al.* Rich-club organization of the newborn human brain. *Proc. Natl. Acad.*  
682 *Sci. U. S. A.* **111**, 7456–61 (2014).
- 683 11. van den Heuvel, M. P. & Sporns, O. Network hubs in the human brain. *Trends Cogn.*  
684 *Sci.* **17**, 683–696 (2013).
- 685 12. Crossley, N. A. *et al.* The hubs of the human connectome are generally implicated in  
686 the anatomy of brain disorders. *Brain* **137**, 2382–2395 (2014).
- 687 13. Catani, M. & ffytche, D. H. The rises and falls of disconnection syndromes. *Brain* **128**,  
688 (2005).
- 689 14. Braun, U. *et al.* in *eLS* 1–9 (John Wiley & Sons, Ltd, 2015).  
690 doi:10.1002/9780470015902.a0025783
- 691 15. Goodkind, M. *et al.* Identification of a common neurobiological substrate for mental  
692 illness. *JAMA psychiatry* **72**, 305–315 (2015).
- 693 16. Lee, P. H. *et al.* Partitioning heritability analysis reveals a shared genetic basis of brain  
694 anatomy and schizophrenia. *Mol. Psychiatry* **21**, 1680–1689 (2016).

- 695 17. Doherty, J. L. & Owen, M. J. Genomic insights into the overlap between psychiatric  
696 disorders: implications for research and clinical practice. *Genome Med.* **6**, 29 (2014).
- 697 18. Anttila, V. *et al.* Analysis of shared heritability in common disorders of the brain.  
698 *bioRxiv* (2016). doi:<http://dx.doi.org/10.1101/048991>
- 699 19. O’Dushlaine, C. *et al.* Psychiatric genome-wide association study analyses implicate  
700 neuronal, immune and histone pathways. *Nat. Neurosci.* **18**, 199–209 (2015).
- 701 20. Nuyen, J. *et al.* Comorbidity was associated with neurologic and psychiatric diseases:  
702 A general practice-based controlled study. *J. Clin. Epidemiol.* **59**, 1274–1284 (2006).
- 703 21. Fornito, A. & Bullmore, E. T. Connectomics: A new paradigm for understanding brain  
704 disease. *Eur. Neuropsychopharmacol.* **25**, 733–748 (2015).
- 705 22. Griffa, A., Baumann, P. S., Thiran, J.-P. & Hagmann, P. Structural connectomics in  
706 brain diseases. *Neuroimage* **80**, 515–526 (2013).
- 707 23. Svatkova, A. *et al.* Physical Exercise Keeps the Brain Connected: Biking Increases  
708 White Matter Integrity in Patients With Schizophrenia and Healthy Controls.  
709 *Schizophr. Bull.* **41**, 869–78 (2015).
- 710 24. Collin, G., Kahn, R. S., de Reus, M. A., Cahn, W. & van den Heuvel, M. P. Impaired  
711 Rich Club Connectivity in Unaffected Siblings of Schizophrenia Patients. *Schizophr.*  
712 *Bull.* **40**, 438–448 (2014).
- 713 25. Collin, G. *et al.* Brain network analysis reveals affected connectome structure in  
714 bipolar I disorder. *Hum. Brain Mapp.* **37**, 122–134 (2016).
- 715 26. van Belle, J., van Hulst, B. M. & Durston, S. Developmental differences in intra-  
716 individual variability in children with ADHD and ASD. *J. Child Psychol. Psychiatry*  
717 **56**, 1316–1326 (2015).
- 718 27. Repple, J. *et al.* A voxel-based diffusion tensor imaging study in unipolar and bipolar  
719 depression. *Bipolar Disord.* **19**, 23–31 (2017).

- 720 28. Reess, T. J. *et al.* Connectomics-based structural network alterations in obsessive-  
721 compulsive disorder. *Transl. Psychiatry* **6**, e882 (2016).
- 722 29. Kennis, M. *et al.* Treatment Outcome-Related White Matter Differences in Veterans  
723 with Posttraumatic Stress Disorder. *Neuropsychopharmacology* **40**, 2434–42 (2015).
- 724 30. Mancini, M. *et al.* Network attack simulations in Alzheimer’s disease: The link  
725 between network tolerance and neurodegeneration. in *2016 IEEE 13th International*  
726 *Symposium on Biomedical Imaging (ISBI)* 237–240 (IEEE, 2016).  
727 doi:10.1109/ISBI.2016.7493253
- 728 31. Serra, L. *et al.* Network-Based Substrate of Cognitive Reserve in Alzheimer’s Disease.  
729 *J. Alzheimer’s Dis.* **55**, 421–430 (2016).
- 730 32. van der Burgh, H. K. *et al.* Deep learning predictions of survival based on MRI in  
731 amyotrophic lateral sclerosis. *NeuroImage Clin.* (2016).  
732 doi:10.1016/j.nicl.2016.10.008
- 733 33. Verstraete, E., Veldink, J. H., Mandl, R. C. W., van den Berg, L. H. & van den Heuvel,  
734 M. P. Impaired Structural Motor Connectome in Amyotrophic Lateral Sclerosis. *PLoS*  
735 *One* **6**, e24239+ (2011).
- 736 34. Walhout, R. *et al.* Brain morphologic changes in asymptomatic C9orf72 repeat  
737 expansion carriers. *Neurology* **85**, 1780–8 (2015).
- 738 35. Cammoun, L. *et al.* Mapping the human connectome at multiple scales with diffusion  
739 spectrum MRI. *J. Neurosci. Methods* **203**, 386–397 (2012).
- 740 36. Desikan, R. S. *et al.* An automated labeling system for subdividing the human cerebral  
741 cortex on MRI scans into gyral based regions of interest. *Neuroimage* **31**, 968–80  
742 (2006).
- 743 37. Fischl, B. *et al.* Automatically Parcellating the Human Cerebral Cortex. *Cereb. Cortex*  
744 **14**, 11–22 (2004).

- 745 38. Andersson, J. L. R. & Sotiropoulos, S. N. An integrated approach to correction for off-  
746 resonance effects and subject movement in diffusion MR imaging. *Neuroimage* **125**,  
747 1063–1078 (2016).
- 748 39. Andersson, J. L. R., Skare, S. & Ashburner, J. How to correct susceptibility distortions  
749 in spin-echo echo-planar images: Application to diffusion tensor imaging. *Neuroimage*  
750 **20**, 870–888 (2003).
- 751 40. Chang, L. C., Walker, L. & Pierpaoli, C. Informed RESTORE: A method for robust  
752 estimation of diffusion tensor from low redundancy datasets in the presence of  
753 physiological noise artifacts. *Magn. Reson. Med.* **68**, 1654–1663 (2012).
- 754 41. Alexander, A. L., Lee, J. E., Lazar, M. & Field, A. S. Diffusion tensor imaging of the  
755 brain. *Neurotherapeutics* **4**, 316–29 (2007).
- 756 42. Zalesky, A. *et al.* Connectome sensitivity or specificity: which is more important?  
757 *Neuroimage* **142**, 407–420 (2016).
- 758 43. Thomas, C. *et al.* Anatomical accuracy of brain connections derived from diffusion  
759 MRI tractography is inherently limited. *Proc. Natl. Acad. Sci. U. S. A.* **111**, 16574–9  
760 (2014).
- 761 44. de Reus, M. A. & van den Heuvel, M. P. Estimating false positives and negatives in  
762 brain networks. *Neuroimage* **70**, 402–9 (2013).
- 763 45. Maier-Hein, K. H. *et al.* The challenge of mapping the human connectome based on  
764 diffusion tractography. *Nat. Commun.* **8**, 1349 (2017).
- 765 46. Mori, S., Crain, B. J., Chacko, V. P. & van Zijl, P. C. M. Three-dimensional tracking  
766 of axonal projections in the brain by magnetic resonance imaging. *Ann. Neurol.* **45**,  
767 265–269 (1999).
- 768 47. Beaulieu, C. The basis of anisotropic water diffusion in the nervous system - a  
769 technical review. *NMR Biomed.* **15**, 435–455 (2002).

- 770 48. Whitlock, M. C. Combining probability from independent tests: the weighted Z-  
771 method is superior to Fisher's approach. *J. Evol. Biol.* **18**, 1368–1373 (2005).
- 772 49. Riley, J. W. *et al.* The American Soldier: Adjustment During Army Life. *American*  
773 *Sociological Review* **14**, 557 (1949).
- 774 50. van den Heuvel, M. *et al.* Proportional thresholding in resting-state fMRI functional  
775 connectivity networks and consequences for patient-control connectome studies:  
776 Issues and recommendations. *Neuroimage* (2017).  
777 doi:10.1016/j.neuroimage.2017.02.005
- 778 51. Glasser, M. F. *et al.* The minimal preprocessing pipelines for the Human Connectome  
779 Project. *Neuroimage* **80**, 105–24 (2013).
- 780 52. Van Essen, D. C. *et al.* The Human Connectome Project: a data acquisition  
781 perspective. *Neuroimage* **62**, 2222–31 (2012).
- 782 53. Rubinov, M. & Sporns, O. Complex network measures of brain connectivity: uses and  
783 interpretations. *Neuroimage* **52**, 1059–69 (2010).
- 784 54. Estrada, E. & Hatano, N. Communicability in complex networks. *Phys. Rev. E* **77**,  
785 36111 (2008).
- 786 55. Irimia, A. & Van Horn, J. D. Systematic network lesioning reveals the core white  
787 matter scaffold of the human brain. *Front. Hum. Neurosci.* **8**, 51 (2014).
- 788 56. de Reus, M. A. & van den Heuvel, M. P. Simulated rich club lesioning in brain  
789 networks: a scaffold for communication and integration? *Front. Hum. Neurosci.* **8**, 647  
790 (2014).
- 791 57. de Reus, M. A., Saenger, V. M., Kahn, R. S. & van den Heuvel, M. P. An edge-centric  
792 perspective on the human connectome: link communities in the brain. *Philos. Trans. R.*  
793 *Soc. London B Biol. Sci.* **369**, (2014).
- 794 58. Benjamini, Y. & Hochberg, Y. Controlling the False Discovery Rate: A Practical and



- 795 Powerful Approach to Multiple Testing. *J. R. Stat. Soc. Ser. B* ... **57**, 289–300 (1995).
- 796 59. Zalesky, A., Fornito, A. & Bullmore, E. T. Network-based statistic: Identifying  
797 differences in brain networks. *Neuroimage* **53**, 1197–1207 (2010).
- 798 60. Sexton, C. E., Mackay, C. E. & Ebmeier, K. P. A Systematic Review of Diffusion  
799 Tensor Imaging Studies in Affective Disorders. *Biol. Psychiatry* **66**, 814–823 (2009).
- 800 61. Ellison-Wright, I. & Bullmore, E. Meta-analysis of diffusion tensor imaging studies in  
801 schizophrenia. *Schizophr. Res.* **108**, 3–10 (2009).
- 802 62. van den Heuvel, M. P. *et al.* Abnormal Rich Club Organization and Functional Brain  
803 Dynamics in Schizophrenia. *JAMA Psychiatry* **70**, 783 (2013).
- 804 63. Grayson, D. S. *et al.* Structural and functional rich club organization of the brain in  
805 children and adults. *PLoS One* **9**, e88297 (2014).
- 806 64. McColgan, P. *et al.* Selective vulnerability of Rich Club brain regions is an  
807 organizational principle of structural connectivity loss in Huntington’s disease. *Brain*  
808 **138**, 3327–3344 (2015).
- 809 65. Bai, F. *et al.* Topologically Convergent and Divergent Structural Connectivity Patterns  
810 between Patients with Remitted Geriatric Depression and Amnesic Mild Cognitive  
811 Impairment. *J. Neurosci.* **32**, (2012).
- 812 66. Lo, C.-Y. *et al.* Diffusion tensor tractography reveals abnormal topological  
813 organization in structural cortical networks in Alzheimer’s disease. *J. Neurosci.* **30**,  
814 16876–85 (2010).
- 815 67. Yao, Z. *et al.* Abnormal Cortical Networks in Mild Cognitive Impairment and  
816 Alzheimer’s Disease. *PLoS Comput. Biol.* **6**, e1001006 (2010).
- 817 68. Langen, C. D. *et al.* THE STRUCTURAL DISCONNECTOME : A PATHOLOGY-  
818 SENSITIVE EXTENSION OF THE STRUCTURAL CONNECTOME Department of  
819 Radiology and Nuclear Medicine , Erasmus MC , Rotterdam , The Netherlands

- 820 Department of Medical Informatics , Erasmus MC , Rotterdam , The Netherland. 366–  
821 370 (2017).
- 822 69. Hamilton, L. S. *et al.* Reduced white matter integrity in attention-deficit hyperactivity  
823 disorder. *Neuroreport* **19**, 1705–8 (2008).
- 824 70. Koldewyn, K. *et al.* Differences in the right inferior longitudinal fasciculus but no  
825 general disruption of white matter tracts in children with autism spectrum disorder.  
826 *Proc. Natl. Acad. Sci. U. S. A.* **111**, 1981–6 (2014).
- 827 71. Peng, Z. *et al.* Brain structural abnormalities in obsessive-compulsive disorder:  
828 Converging evidence from white matter and grey matter. *Asian J. Psychiatr.* **5**, 290–  
829 296 (2012).
- 830 72. Karlsgodt, K. H. *et al.* Diffusion Tensor Imaging of the Superior Longitudinal  
831 Fasciculus and Working Memory in Recent-Onset Schizophrenia. *Biol. Psychiatry* **63**,  
832 512–518 (2008).
- 833 73. Ashtari, M. *et al.* Disruption of White Matter Integrity in the Inferior Longitudinal  
834 Fasciculus in Adolescents With Schizophrenia as Revealed by Fiber Tractography.  
835 *Arch. Gen. Psychiatry* **64**, 1270 (2007).
- 836 74. Pantelis, C. *et al.* Structural Brain Imaging Evidence for Multiple Pathological  
837 Processes at Different Stages of Brain Development in Schizophrenia. *Schizophr. Bull.*  
838 **31**, 672–696 (2005).
- 839 75. Fornito, A., Zalesky, A. & Breakspear, M. The connectomics of brain disorders. *Nat.*  
840 *Rev. Neurosci.* **16**, 159–172 (2015).
- 841 76. van den Heuvel, M. P., Scholtens, L. H., Feldman Barrett, L., Hilgetag, C. C. & de  
842 Reus, M. A. Bridging Cytoarchitectonics and Connectomics in Human Cerebral  
843 Cortex. *J. Neurosci.* **35**, 13943–13948 (2015).
- 844 77. de Haan, W., Mott, K., van Straaten, E. C. W., Scheltens, P. & Stam, C. J. Activity

- 845           Dependent Degeneration Explains Hub Vulnerability in Alzheimer’s Disease. *PLoS*  
846           *Comput. Biol.* **8**, e1002582 (2012).
- 847   78.   Buckner, R. L. *et al.* Cortical hubs revealed by intrinsic functional connectivity:  
848           mapping, assessment of stability, and relation to Alzheimer’s disease. *J Neurosci* **29**,  
849           1860–1873 (2009).
- 850   79.   Iturria-Medina, Y. *et al.* Epidemic Spreading Model to Characterize Misfolded  
851           Proteins Propagation in Aging and Associated Neurodegenerative Disorders. *PLoS*  
852           *Comput. Biol.* **10**, e1003956 (2014).
- 853   80.   Schmidt, R., de Reus, M. A., Scholtens, L. H., van den Berg, L. H. & van den Heuvel,  
854           M. P. Simulating disease propagation across white matter connectome reveals  
855           anatomical substrate for neuropathology staging in amyotrophic lateral sclerosis.  
856           *Neuroimage* **124**, 762–769 (2016).
- 857   81.   Zhou, J., Gennatas, E. D., Kramer, J. H., Miller, B. L. & Seeley, W. W. Predicting  
858           Regional Neurodegeneration from the Healthy Brain Functional Connectome. *Neuron*  
859           **73**, 1216–1227 (2012).
- 860   82.   Raj, A., Kuceyeski, A. & Weiner, M. A Network Diffusion Model of Disease  
861           Progression in Dementia. *Neuron* **73**, 1204–1215 (2012).
- 862   83.   Wierenga, L. M. *et al.* A multisample study of longitudinal changes in brain network  
863           architecture in 4-13-year-old children. *Hum. Brain Mapp.* **0**, (2017).
- 864   84.   Baker, S. T. E. *et al.* Developmental Changes in Brain Network Hub Connectivity in  
865           Late Adolescence. *J. Neurosci.* **35**, 9078–87 (2015).
- 866   85.   Whitaker, K. J. *et al.* Adolescence is associated with genomically patterned  
867           consolidation of the hubs of the human brain connectome. *Proc. Natl. Acad. Sci. U. S.*  
868           *A.* **113**, 9105–10 (2016).
- 869   86.   Dennis, E. L. *et al.* Development of the ‘rich club’ in brain connectivity Networks

- 870 from 438 adolescents & adults aged 12 to 30. *Proceedings. IEEE Int. Symp. Biomed.*  
871 *Imaging* 624–627 (2013). doi:10.1109/ISBI.2013.6556552
- 872 87. de Groot, J. C. *et al.* Cerebral white matter lesions and cognitive function: the  
873 Rotterdam Scan Study. *Ann. Neurol.* **47**, 145–51 (2000).
- 874 88. Millan, M. J. *et al.* Cognitive dysfunction in psychiatric disorders: characteristics,  
875 causes and the quest for improved therapy. *Nat. Rev. Drug Discov.* **11**, 141–168  
876 (2012).
- 877 89. McLaughlin, R. L. *et al.* Genetic correlation between amyotrophic lateral sclerosis and  
878 schizophrenia. *Nat. Commun.* **8**, 14774 (2017).
- 879 90. Cross-Disorder Group of the Psychiatric Genomics Consortium, C.-D. G. of the P. G.  
880 *et al.* Genetic relationship between five psychiatric disorders estimated from genome-  
881 wide SNPs. *Nat. Genet.* **45**, 984–94 (2013).
- 882 91. Schulze, T. G. *et al.* Molecular genetic overlap in bipolar disorder, schizophrenia, and  
883 major depressive disorder. *World J. Biol. Psychiatry* **15**, 200–208 (2014).
- 884 92. Romme, I. A. C., de Reus, M. A., Ophoff, R. A., Kahn, R. S. & van den Heuvel, M. P.  
885 Connectome Disconnectivity and Cortical Gene Expression in Patients With  
886 Schizophrenia. *Biol. Psychiatry* (2016). doi:10.1016/j.biopsych.2016.07.012
- 887 93. Mufford, M. S. *et al.* Neuroimaging genomics in psychiatry—a translational approach.  
888 *Genome Med.* **9**, 102 (2017).
- 889 94. Wang, T. *et al.* Polygenic risk for five psychiatric disorders and cross-disorder and  
890 disorder-specific neural connectivity in two independent populations. *NeuroImage*  
891 *Clin.* **14**, 441–449 (2017).
- 892 95. Sweeney, T. E., Haynes, W. A., Vallania, F., Ioannidis, J. P. & Khatry, P. Methods to  
893 increase reproducibility in differential gene expression via meta-analysis. *Nucleic*  
894 *Acids Res.* **45**, e1 (2017).

- 895 96. van den Heuvel, M. P. *et al.* Comparison of diffusion tractography and tract-tracing  
896 measures of connectivity strength in rhesus macaque connectome. *Hum. Brain Mapp.*  
897 **36**, 3064–3075 (2015).
- 898 97. Jbabdi, S. & Johansen-Berg, H. Tractography: where do we go from here? *Brain*  
899 *Connect.* **1**, 169–83 (2011).
- 900
- 901

**Figure 1. Demographics.** Age distribution of controls (top) and patients (bottom) for all twelve examined disorders. Age ranged between 6 – 90 years. Controls and patients within datasets were matched on age and gender.

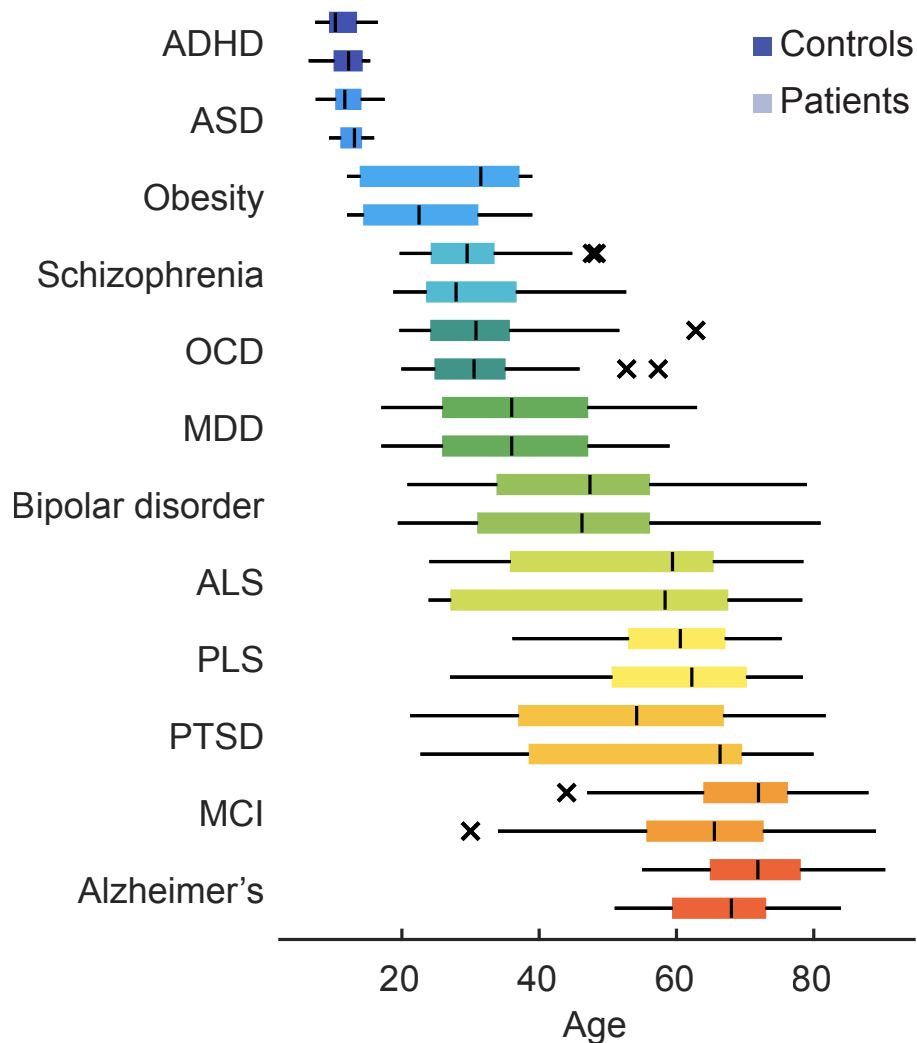

**Figure 2. Cross-disorder involvement.** (A) Overview of data aggregation and analysis. Per disorder, a connection-wise disorder-specific disconnectivity map was computed contrasting the fractional anisotropy of connections in patients and matched controls. Disorder-specific disconnectivity maps were combined to determine the disconnectivity distribution across disorders. (B) Schematic representation of human reference connectome with connections colored by cross-disorder involvement. (C) Superior (left panel) frontal (right-top panel) and medial (right-bottom panel) view of brain connectivity colored by cross-disorder involvement. (D) Lateral and medial view of left and right hemispheres showing region-wise cross-disorder involvement. (E) Network including 34 regions (colored blue) that showed significant involvement across disorders (NBS analysis,  $p = 0.0003$ ).

**A Methods**

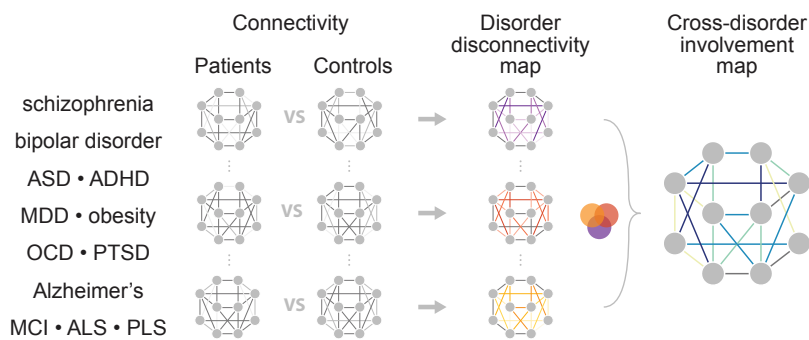

**B Schematic network representation**

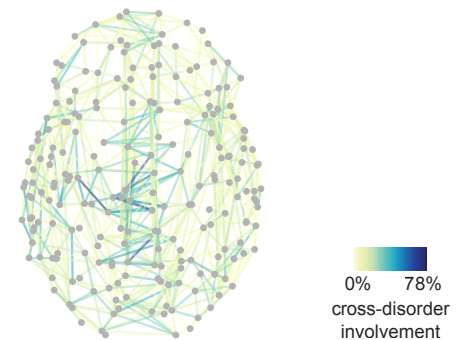

**C Spatial representation**

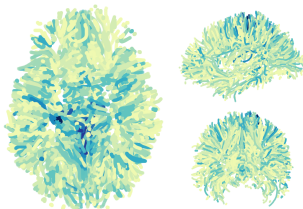

**D region-wise cross-disorder involvement**

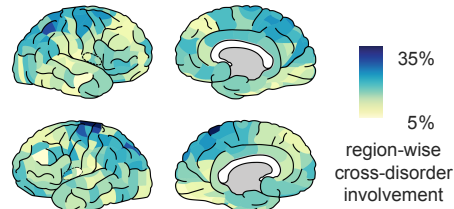

**E NBS analysis network**

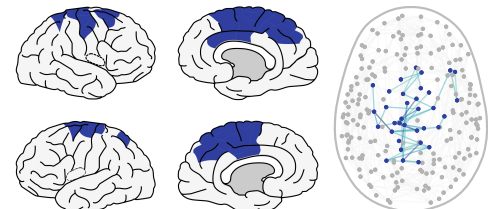

**Figure 3. Rich club organization.** (A) Cross-disorder involvement of rich club connections was significantly 24% higher as compared to the set of local connections ( $p = 0.0048$ ) and 17% higher than observed in the set of feeder connections ( $p = 0.0328$ ). Error bars mark the standard deviation. (B) Hub regions (top 15% highest degree regions, 29 regions) are colored in red. (C) Schematic representation of human reference connectome with rich club connections (colored red), feeder connections (orange) and local connections (yellow).

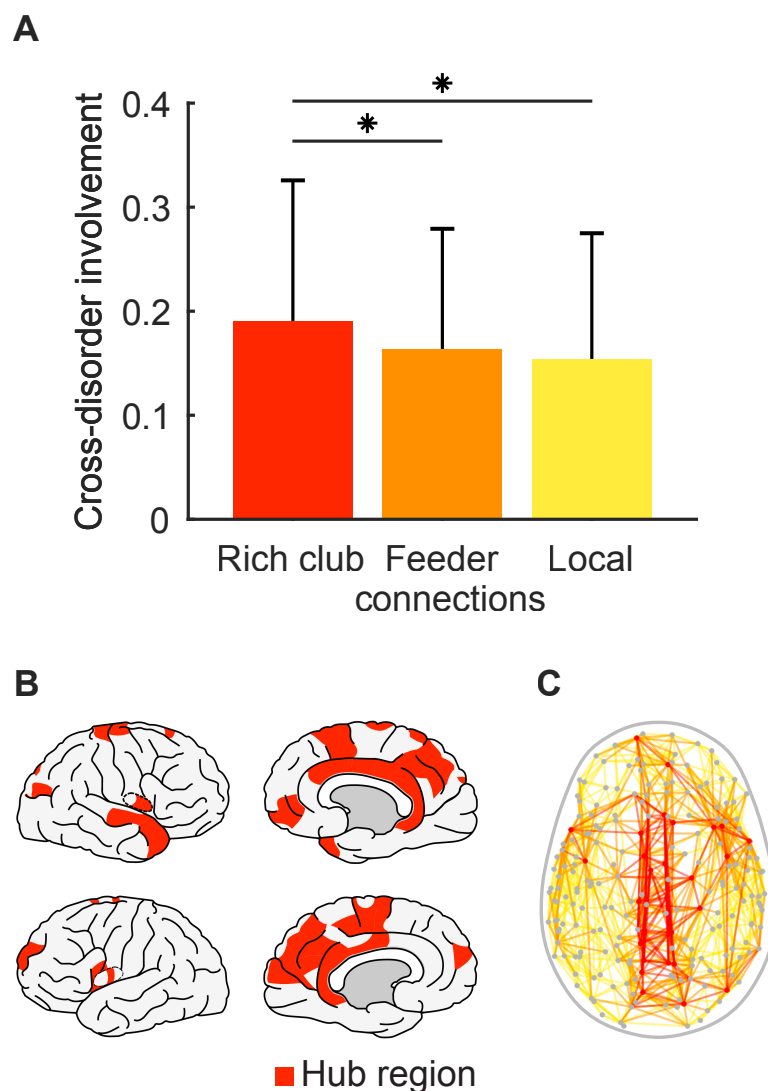



**Figure 4. Edgewise network measures.** From left to right, average cross-disorder involvement of connections with highest edge betweenness centrality (top 25% shown), highest edge-removal effect on communicability, highest edge removal effect on clustering and long-distance connections. Observed values (blue) were compared with average cross-disorder involvement in subject-label permuted maps (grey). Connections important for global topological (edge betweenness centrality, and communicability) and spatial (long-distance connections) integration showed significantly higher cross-disorder involvement levels than expected for randomly distributed disease effects (indicated by an asterisk \*,  $p < 0.05$ ).

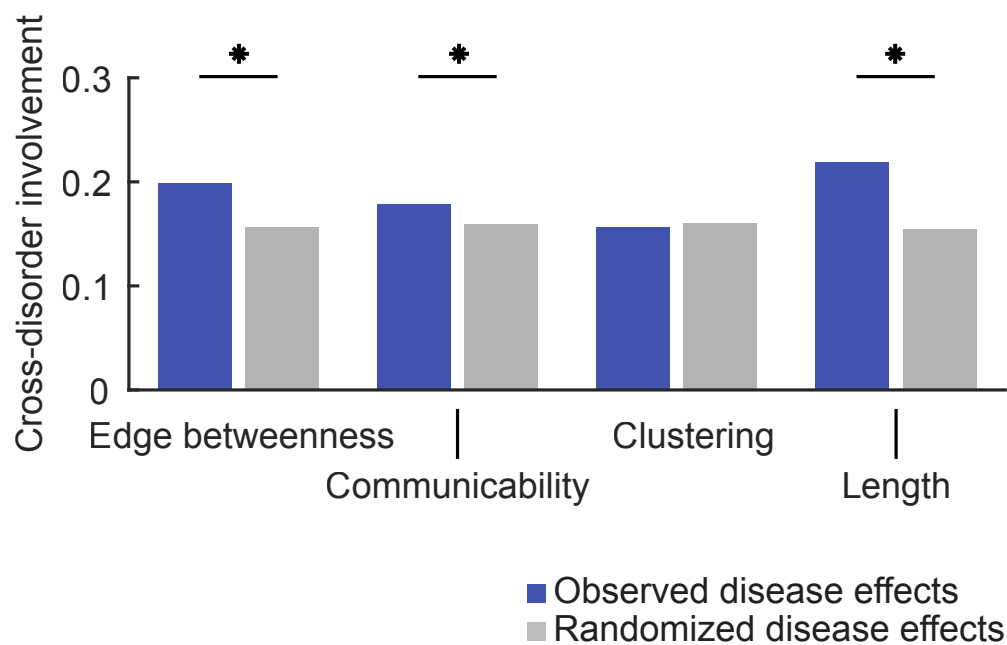

**Table 1.** Demographics after data quality control and matching.

| Disease          | Nr. con. | Nr. pat. | Age            |                |         | Sex                    |                        |         | References  |
|------------------|----------|----------|----------------|----------------|---------|------------------------|------------------------|---------|-------------|
|                  |          |          | Con. mean (SD) | Pat. mean (SD) | P-value | Con. male/female (%/%) | Pat. male/female (%/%) | P-value |             |
| ADHD             | 14       | 33       | 12.07 (2.48)   | 11.15 (2.54)   | 0.27    | 13/1 (92.9/.7.1)       | 27/6 (81.8/.18.2)      | 0.33    | 1           |
| ALS              | 45       | 45       | 50.99 (19.10)  | 51.98 (15.98)  | 0.79    | 37/8 (82.2/.17.8)      | 33/12 (73.3/.26.7)     | 0.31    | 2-4         |
| MCI I            | 28       | 28       | 57.89 (12.22)  | 62.79 (7.81)   | 0.09    | 15/13 (53.6/.46.4)     | 19/9 (67.9/.32.1)      | 0.27    | 5           |
| MCI II           | 17       | 95       | 72.80 (6.74)   | 72.48 (7.22)   | 0.87    | 8/8 (50.0/.50.0)       | 56/33 (62.9/.37.1)     | 0.33    | ADNI        |
| OCD              | 41       | 36       | 31.71 (8.27)   | 31.50 (9.40)   | 0.92    | 18/23 (43.9/.56.1)     | 14/22 (38.9/.61.1)     | 0.66    | 6           |
| PLS              | 32       | 32       | 59.18 (14.60)  | 59.93 (9.70)   | 0.81    | 19/13 (59.4/.40.6)     | 17/15 (53.1/.46.9)     | 0.61    | 2-4         |
| PTSD I           | 25       | 45       | 36.92 (10.61)  | 37.98 (9.31)   | 0.67    | 25/0 (100.0/.0.0)      | 45/0 (100.0/.0.0)      | 1.00    | 7           |
| PTSD II          | 40       | 40       | 69.86 (4.50)   | 68.04 (3.86)   | 0.06    | 40/0 (100.0/.0.0)      | 40/0 (100.0/.0.0)      | 1.00    | DOD<br>ADNI |
| Alzheimer's I    | 19       | 19       | 62.26 (7.45)   | 65.89 (5.75)   | 0.11    | 8/11 (42.1/.57.9)      | 11/8 (57.9/.42.1)      | 0.33    | 5,8         |
| Alzheimer's II   | 16       | 37       | 72.24 (4.54)   | 75.04 (8.80)   | 0.24    | 5/8 (38.5/.61.5)       | 21/14 (60.0/.40.0)     | 0.18    | ADNI        |
| ASD              | 17       | 32       | 12.72 (1.84)   | 12.10 (2.48)   | 0.38    | 15/2 (88.2/.11.8)      | 27/5 (84.4/.15.6)      | 0.71    | 1           |
| Bipolar disorder | 82       | 82       | 45.18 (14.62)  | 45.86 (13.41)  | 0.76    | 42/40 (51.2/.48.8)     | 49/33 (59.8/.40.2)     | 0.27    | 9           |
| MDD              | 478      | 211      | 37.19 (11.76)  | 36.93 (12.15)  | 0.79    | 210/268 (43.9/.56.1)   | 104/107 (49.3/.50.7)   | 0.19    | 10          |
| Obesity          | 32       | 30       | 23.53 (8.66)   | 26.80 (10.72)  | 0.20    | 15/17 (46.9/.53.1)     | 10/20 (33.3/.66.7)     | 0.28    | 11          |
| schizophrenia I  | 107      | 107      | 29.62 (7.54)   | 29.48 (7.38)   | 0.89    | 71/34 (67.6/.32.4)     | 83/24 (77.6/.22.4)     | 0.10    | 12          |
| schizophrenia II | 23       | 23       | 31.46 (7.36)   | 31.54 (3.23)   | 0.96    | 17/6 (73.9/.26.1)      | 18/5 (78.3/.21.7)      | 0.73    | 13          |
